# Supplementary material for: The extended disordered sequences in ribosome-associated germline-specific NAC proteins are their feature compared to the ubiquitously expressed paralog
Source: Research Square preprint supplement (doi:10.21203/rs.3.rs-1430778/v1), 2022-03-14

**Figure S1.** The alignments of tesNAC-β and the orthologous gNAC-β-like proteins. The region with S/T phosphosites is underlined by a red line and markers: crosses indicate the conservative Ser positions in *D. melanogaster* and *D. willistoni* IDR sequences; circles indicate conservative S positions between *D. willistoni* and *D. buskii* IDR sequences.

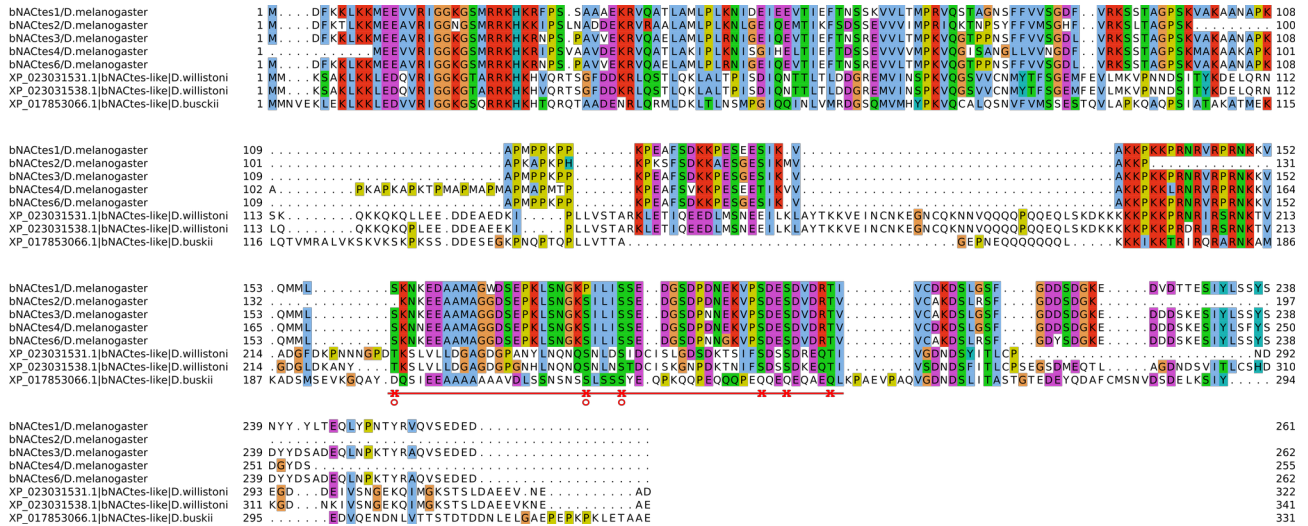

**Figure S2.** Conserved potential P-dependent clustered phosphosites at the orthologous IDR enriched C-ends of uncNAC- $\beta$  proteins. The region with S/T phosphosites is underlined by a red line and markers: crosses indicate the conservative Ser positions.

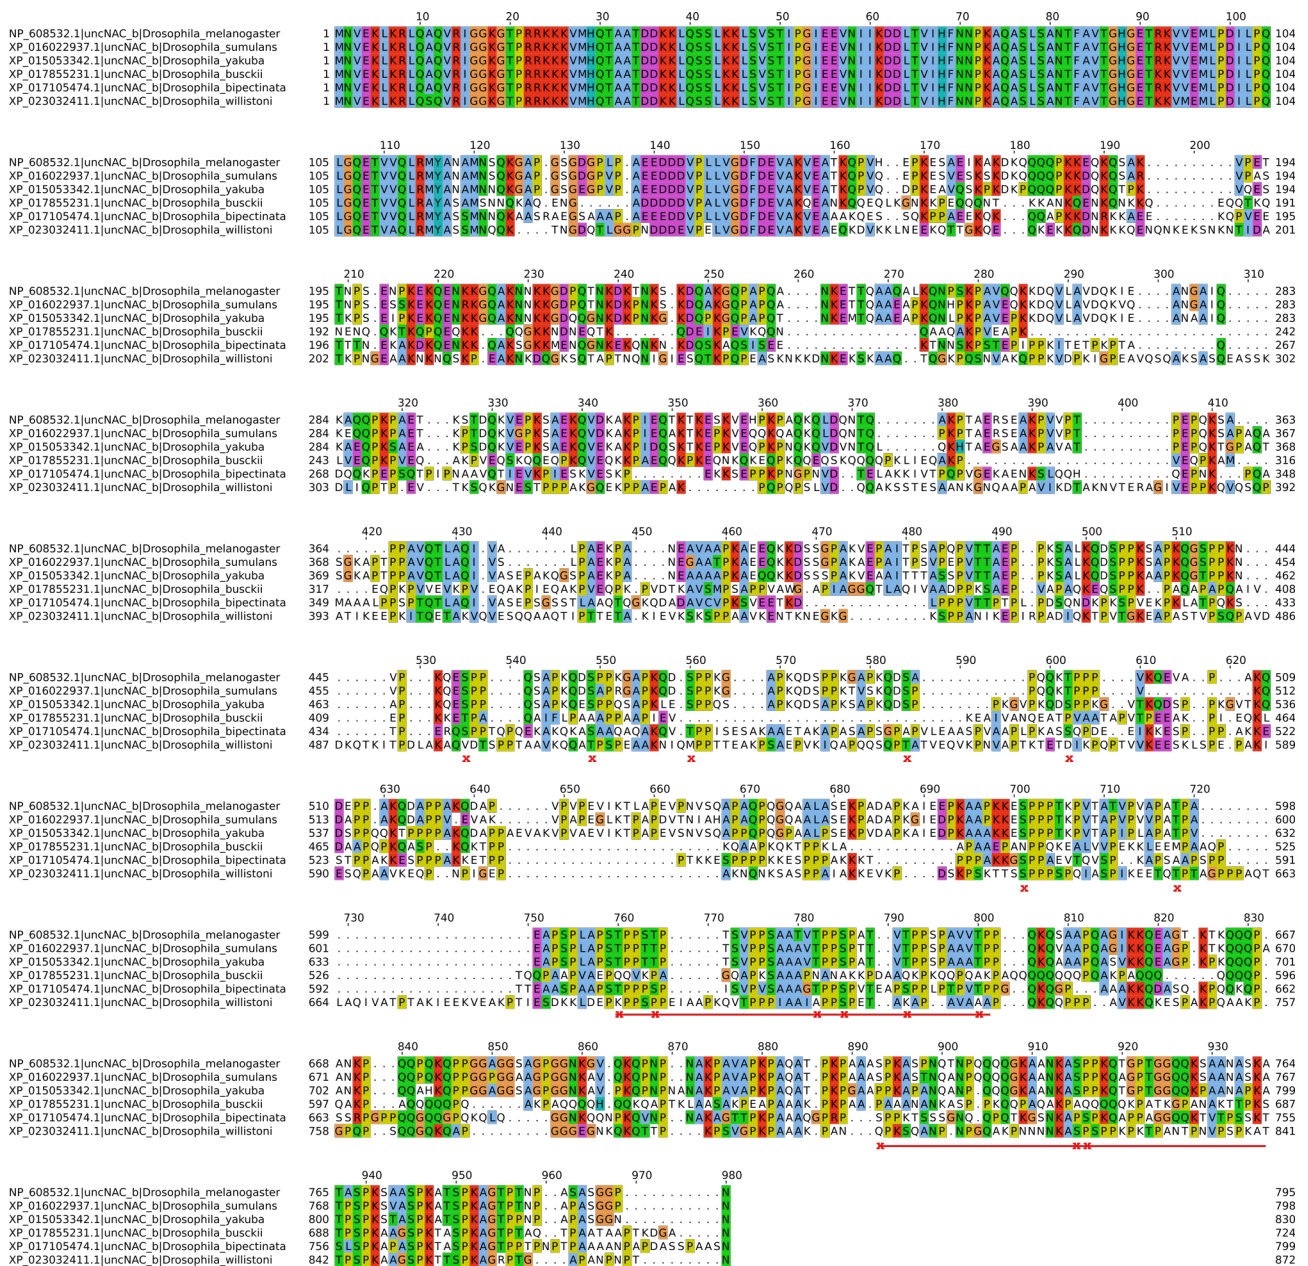



**Figure S3.** The phylogenetic trees for the NAC- $\alpha$  (**A**) and NAC- $\beta$  (**B**) proteins of the Drosophilidae genomes. The species, accession number of protein and genomic coordinates of the gene are shown. The identified protein is marked as a “novel” if its accession number is non-available at the non-annotated genome. The blue integers indicate the bootstrap values (only values greater than 0.5 are shown).

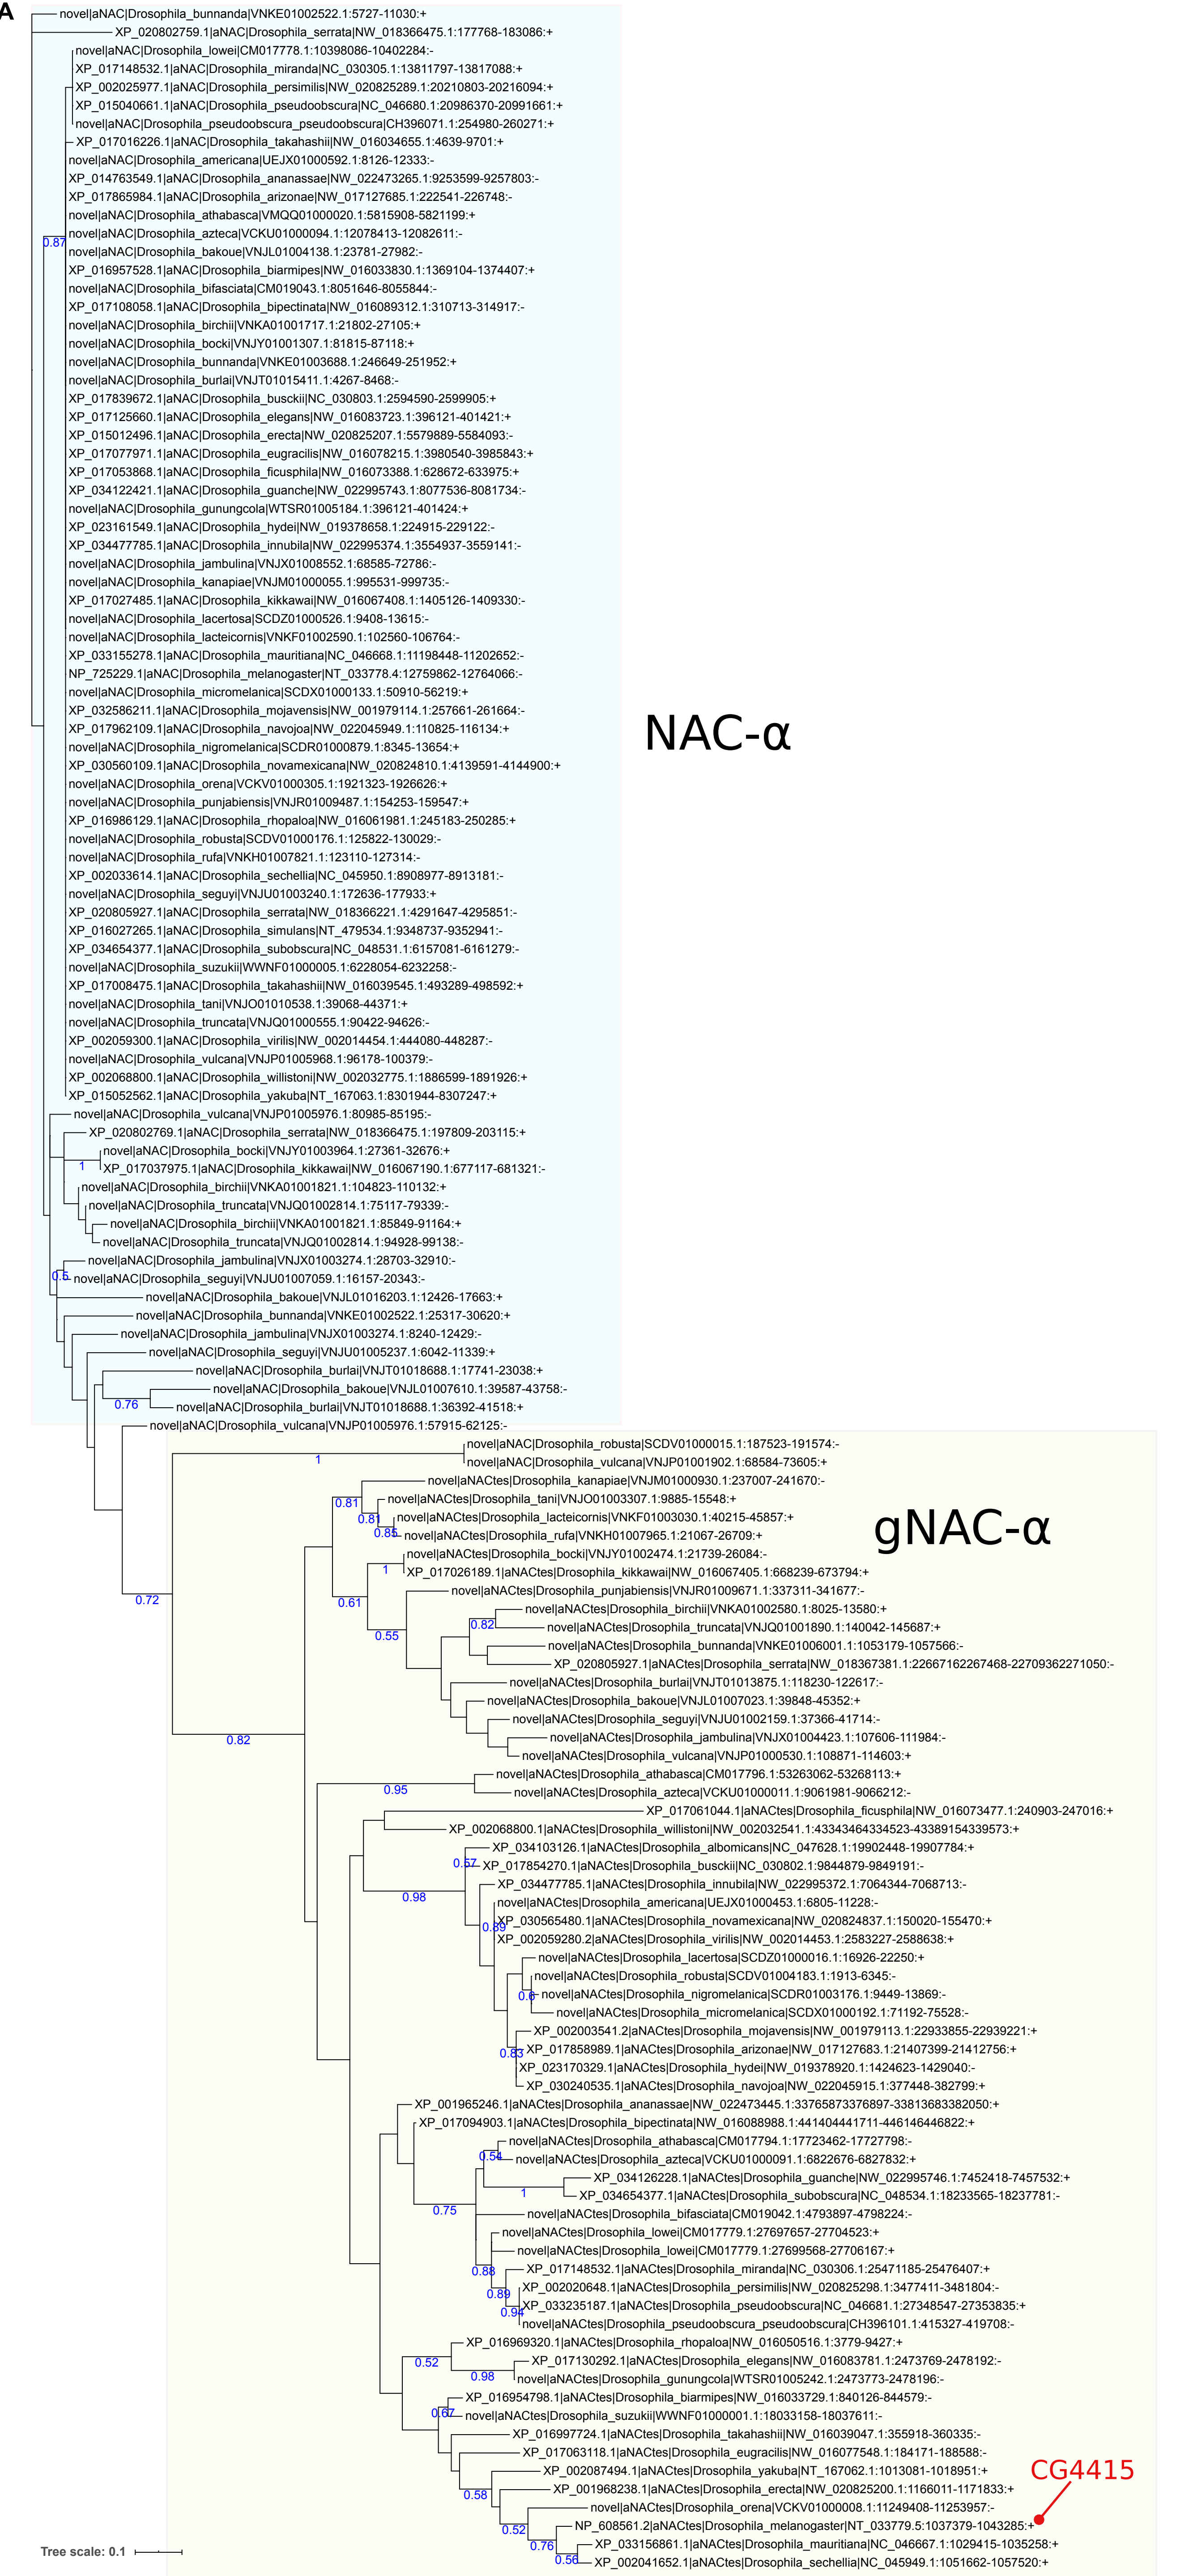



Figure S3

B

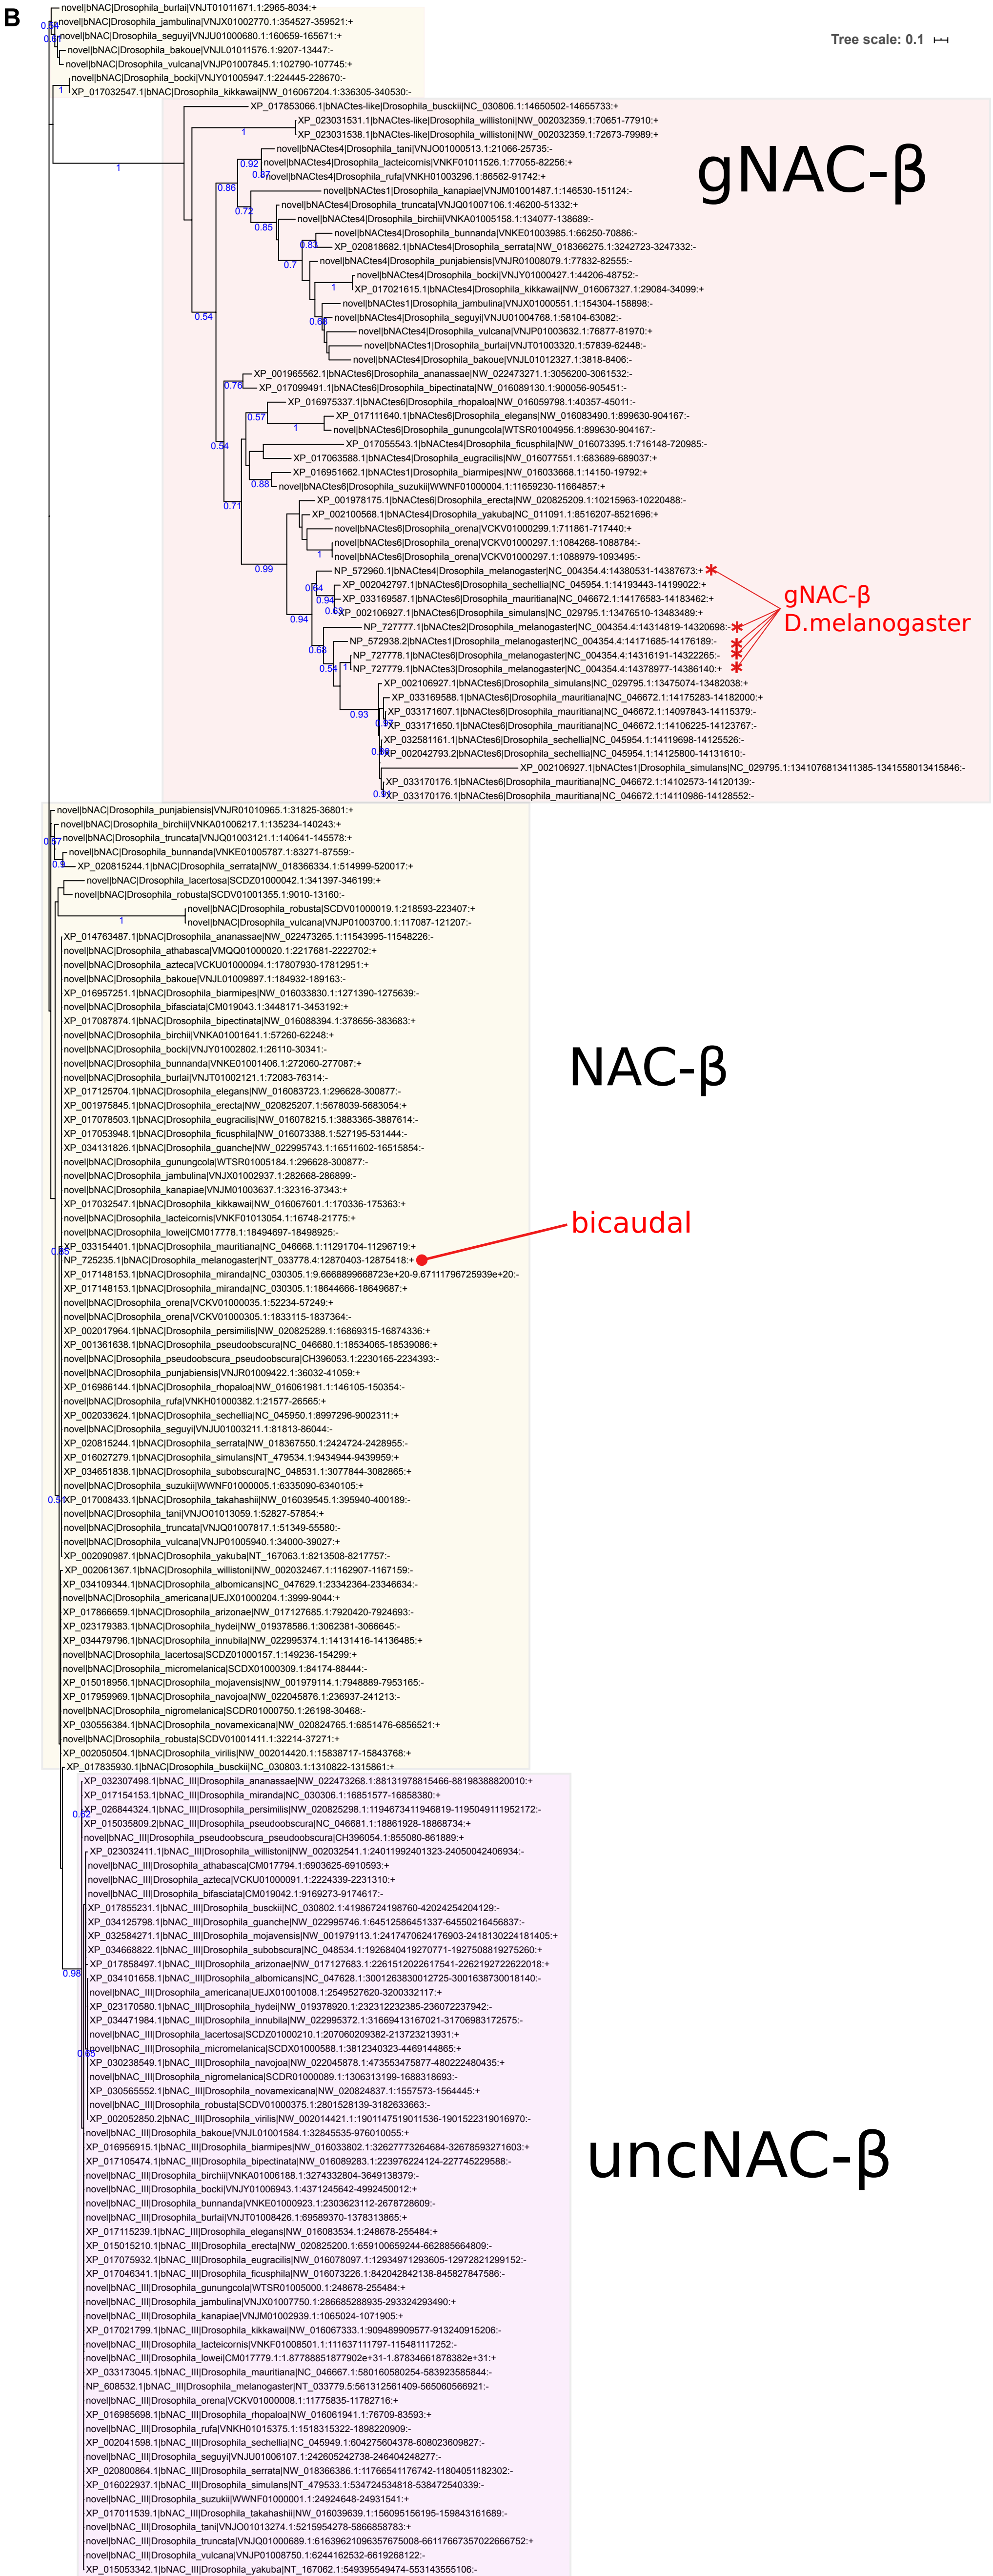

Supplement: Supplementary file 1 [file 08e4b8a45419cd0696493a1f.zip]
